1 **Title:** GABA-ergic dynamics in human frontotemporal networks confirmed by pharmaco-  
2 magnetoencephalography.

3 **Abbreviated:** GABA networks by pharmaco-MEG.

4 **Authors:** Natalie E. Adams<sup>1</sup>, Laura E. Hughes<sup>1,2</sup>, Holly N. Phillips<sup>1</sup>, Alexander D. Shaw<sup>2</sup>, Alexander G.  
5 Murley<sup>1</sup>, Thomas E. Cope, W. Richard Bevan-Jones, Luca Passamonti, James B. Rowe<sup>1,2</sup>

6 <sup>1</sup> Department of Clinical Neurosciences, Cambridge Biomedical Campus, University of Cambridge,  
7 Cambridge, CB2 0QQ, UK

8 <sup>2</sup> MRC Cognition and Brain Sciences Unit, 15 Chaucer Road, Cambridge, CB2 7EF, UK

9 <sup>3</sup> Cambridge Centre for Ageing and Neuroscience (Cam-CAN), University of Cambridge, UK

10 **Corresponding Author:** James B. Rowe, [james.rowe@mrc-cbu.cam.ac.uk](mailto:james.rowe@mrc-cbu.cam.ac.uk)

11 **Number of Pages:** 35

12 **Number of Figures:** 4

13 **Number of Tables:** 1

14 **Number of Words for Abstract:** 219

15 **Number of Words for Introduction:** 647

16 **Number of Words for Discussion:** 1489

17 **Conflict of Interest:** The authors declare no competing financial interests.

18 **Acknowledgements:** This work was funded by the Wellcome Trust (103838), the National Institute  
19 for Health Research Cambridge Biomedical Research Centre and the Medical Research Council  
20 (MC\_U105597119; MC\_U\_00005/12; SUAG/004/91365) and Holt Fellowship. We thank the PSP  
21 Association & FTD Support Group for raising awareness of the study. We also thank CUBRIC, Cardiff  
22 University, Maindy Road, Cardiff, CF244QH; and the School of Psychology, Cardiff University, 70 Park  
23 Pl, Cardiff, CF10 3AS, UK.

24 **Abstract**

25 To bridge the gap between preclinical cellular models of disease and *in vivo* imaging of human  
26 cognitive network dynamics, there is a pressing need for informative biophysical models. Here we  
27 assess dynamic causal models (DCM) of cortical network responses, inverted to  
28 magnetoencephalographic observations during an auditory oddball roving paradigm in healthy  
29 adults. This paradigm induces robust perturbations that permeate frontotemporal networks,  
30 including an evoked ‘mismatch negativity’ response and transiently induced oscillations. Here, we  
31 probe GABAergic influences of the networks using double-blind placebo-controlled randomised-  
32 crossover administration of the GABA re-uptake inhibitor, tiagabine (oral, 10mg) in healthy older  
33 adults. We demonstrate the facility of conductance-based neural mass mean-field models,  
34 incorporating local synaptic connectivity, to investigate laminar-specific and GABAergic mechanisms  
35 of the auditory response. The neuronal model accurately recapitulated the observed  
36 magnetoencephalographic data. Using parametric empirical Bayes for optimal model inversion  
37 across both sessions, we identify the effect of tiagabine on GABAergic modulation of deep pyramidal  
38 and interneuronal cell populations. Moreover, in keeping with the hierarchical coding of beliefs and  
39 sensory evidence, we found a transition of the main GABAergic drug effects from auditory cortex in  
40 standard trials to prefrontal cortex in deviant trials. The successful integration of pharmaco-  
41 magnetoencephalography with dynamic causal models of frontotemporal networks provides a  
42 potential platform on which to evaluate the effects of disease and pharmacological interventions.

43

44 **Significance Statement**

45 Understanding human brain function and developing new treatments require good models of brain  
46 function. We tested a detailed generative model of cortical microcircuits that accurately reproduced  
47 human magnetoencephalography, to quantify network dynamics and connectivity in frontotemporal  
48 cortex. This approach correctly identified the effect of a test drug (tiagabine) on neuronal function  
49 (GABA-ergic dynamics), opening the way for psychopharmacological studies in health and disease  
50 with the mechanistic precision afforded by generative models of the brain.

51

## 52 **Introduction**

53 The development of biophysically informed models of cognition and cognitive disorders would  
54 facilitate the effective translation of the mechanisms and treatments of disease. In recent years  
55 there has been progress towards detailed generative models that replicate neurophysiological  
56 correlates of cognition based on cellular and network dynamics. Such ‘Dynamic Causal Models’  
57 (DCM) make spatiotemporal and spectral predictions that approximate observations by functional  
58 magnetic resonance imaging or electro- and magneto-encephalography (MEG) (Moran et al., 2013).  
59 To be most useful, these models should incorporate laminar, cellular and synaptic functions (Bastos  
60 et al., 2012), and adhere to basic principles of cortical connectivity (Shipp, 2016), while also being  
61 sufficiently tractable and accurate to study human cognition.

62 The DCM framework developed to meet these criteria, with applications in health and neurological  
63 disorders (Kiebel et al., 2008; Stephan et al., 2008; Boly et al., 2011; Marreiros et al., 2015). DCM  
64 models draw on empirical priors for synaptic time constants and conductances, together with a  
65 mean-field forward model for each major neuronal class. For each brain region, subject and  
66 condition the models’ parameters are optimised by inversion to neurophysiological data. Although  
67 such models are supported by extensive data for face-validity (Stephan et al., 2008, 2015) and  
68 construct-validity (Razi et al., 2015), it is critical that they also achieve predictive validity (Moran et  
69 al., 2014; Gilbert and Moran, 2016; Shaw et al., 2018).

70 We therefore undertook DCM of human frontotemporal cortical networks during a roving auditory  
71 oddball paradigm, during which sequences of tones are presented that intermittently change in  
72 frequency. The first instance of each frequency change is considered a ‘deviant tone’, which  
73 gradually becomes a ‘standard’ through repetition. Auditory oddball paradigms reveal characteristic  
74 early (<300ms) MEG responses to standard and deviant tones. The differential response to these  
75 tones (the Mismatch Negativity, MMN) is abnormal in many neurological diseases (Boly et al., 2011;  
76 Naatanen et al., 2011; Hughes et al., 2013). The MMN has been proposed to represent a prediction  
77 error in hierarchical frontotemporal networks (Garrido et al., 2009b; Phillips et al., 2015). However,

78 earlier models did not reveal the mechanisms of laminar or synaptic function that generate the  
79 MMN within the frontal and temporal cortex.

80 To examine laminar-level dynamics in response to auditory stimuli we used an extended-DCM. In six  
81 connected frontotemporal regions (based on Phillips et al., 2015, 2016), we used a conductance-  
82 based canonical mean-field cortical modelling scheme (Moran et al., 2013; Marreiros et al., 2015).

83 We introduce cortico-thalamic cells with intrinsic conductances implicated in burst-firing that enable  
84 the model to generate beta activity involved in the transfer of deep-layer information (Roopun et al.,  
85 2008a, 2010; Bordas et al., 2015; Michalareas et al., 2016). We also employ separate inhibitory  
86 interneuronal populations for superficial and deep pyramidal cells (e.g. Jiang *et al.*, 2015). These  
87 extensions improve the model's functionality in terms of cortico-cortical and cortico-thalamocortical  
88 transmission and provide a substrate for the greater separation of laminar dynamics. We tested the  
89 model's ability to accurately generate evoked magnetoencephalographic responses (i.e. event  
90 related fields, ERF).

91 We used the drug tiagabine to test how well the neurophysiological model could identify changes in  
92 the causes of neuronal dynamics. Tiagabine inhibits re-uptake of the inhibitory neurotransmitter  
93 gamma-amino-butyric acid (GABA), which is critical for the generation of physiological responses and  
94 rhythms in local and global processing (Whittington et al., 2000). This pharmacological specificity  
95 provides a more controlled test of dynamic causal models than autoimmune (Symmonds et al.,  
96 2018) and genetic channelopathies (Gilbert et al., 2016).

97 Using parametric empirical Bayes to optimise the model across participants and drug conditions we  
98 examined how GABAergic dynamics in the model are altered by tiagabine. Based on the hypothesis  
99 that prediction and prediction error depend on short-term GABAergic plasticity (Castro-Alamancos  
100 and Connors, 1996; Garrido et al., 2009a; Mongillo et al., 2018; Spriggs et al., 2018), we predicted  
101 that upper and lower hierarchical frontotemporal processing would be differentially affected by  
102 tiagabine during standard and deviant tones.

## 103 **Materials and Methods**

### 104 *Experimental Design:*

105 We undertook a randomised placebo-controlled double-blind crossover study of the effects of  
106 tiagabine in 20 healthy adults (aged  $67.5 \pm 4.2$ , ten male). Participants had no neurological or  
107 psychiatric illness and were recruited from the MRC Cognition and Brain Sciences and Join Dementia  
108 Research volunteer panels. The study was approved by the Cambridge Research Ethics Committee  
109 and written informed consent was acquired, in keeping with the declaration of Helsinki.

110 Neurophysiological responses were measured in an auditory roving oddball paradigm (Garrido et al.,  
111 2008). Binaural sinusoidal tones were presented in phase via ear-pieces for 75 ms (with 7.5ms ramp  
112 up and down at start and end of the tone), at 500 ms intervals. The frequency of the tone increased  
113 or decreased in steps of 50 Hz (range 400 – 800 Hz) after 3 to 10 repetitions. Auditory thresholds  
114 were assessed in quiet at 500, 1,000, and 1,500 Hz. Tones were presented at 60dB above the  
115 average threshold for a standard population through the earpieces in the MEG.

116 Each participant attended two MEG sessions with a minimum two weeks interval. They received  
117 either 10 mg oral tiagabine or a placebo, in randomised order. Bloods were taken 105 minutes later,  
118 immediately prior to MEG data acquisition, to coincide with peak plasma levels and CNS penetration  
119 (Nutt et al., 2015).

### 120 *Data Acquisition and pre-processing:*

121 Magnetoencephalography (MEG) used a 306-channel Vectorview acquisition system (Elekta  
122 Neuromag, Helsinki) in a light Elekta Neuromag magnetically-shielded room. This consists of a pair of  
123 gradiometers and a magnetometer at each of 102 locations, sampled at 1000 Hz. Vertical and  
124 horizontal EOGs tracked eye movements and 5 head-position indicator coils tracked head position. A  
125 MEG-Compatible 70 channel EEG cap (EasyCap GmbH) using Ag/AgCl electrodes positioned  
126 according to the 10-20 system was used concurrently. A 3D digitizer (Fastrak Polhemus Inc.,  
127 Colchester, VA) was used to record >100 scalp data points, nasion and bilateral pre-auricular

128 fiducials. Subjects also underwent T1-weighted structural magnetic resonance imaging (MPRAGE  
129 sequence, TE = 2.9 ms, TR = 2000 ms, 1.1mm isotropic voxels) using a 3T Siemens PRISMA scanner.  
130 MEG data pre-processing included head position alignment and movement compensation  
131 headcoils and employed the temporal extension of Signal Space Separation with MaxFilter v2.2  
132 (Elekta Neuromag). The auto-detection of bad channels was combined with manual input of any  
133 channels logged as bad during data acquisition. The Statistical Parametric Mapping toolbox (SPM12)  
134 (The Wellcome Trust Centre for Neuroimaging, UCL, UK) was used for further pre-processing and  
135 analysis, in conjunction with modified and custom MATLAB scripts (MATLAB 2017a, Mathworks,  
136 Natick, MA). Data were Butterworth filtered between 1 and 180 Hz, epoched from -100 ms to 400  
137 ms relative to the auditory stimuli and artefact rejected using EOG, EEG and MEG channel  
138 thresholding. Spectral analyses were performed using a multi-taper method. The deviant trial was  
139 taken as the 1<sup>st</sup> trial of a train, regardless of the frequency and the 6<sup>th</sup> trial of a train was modelled as  
140 'standard'.

141 Source reconstruction used a forward model estimated using the single shell cortical mesh from  
142 each individual's T1-weighted MR structural scan. After co-registration using the fiducials and head  
143 points, local fields (LFs) for 6 sources of interest were source-reconstructed using SPM "COH"  
144 method, a combination of LORETA and minimum norm (Pascual-Marqui et al., 1994; Heers et al.,  
145 2016). Sources of interest were (MNI coordinates in parentheses): left auditory cortex (LAud; -42, -  
146 22, 7), left superior temporal gyrus (LSTG; -61 -32 8), left inferior frontal gyrus (LIFG; -46 20 8), right  
147 auditory cortex (RAud; 46, -14, 8), right superior temporal gyrus (RSTG; 59 -25 8) and right inferior  
148 frontal gyrus (RIFG; 46 20 8). To create images of induced power, SPM-LORETA was used for source  
149 localization of a 5 mm<sup>3</sup> regular grid at the MMN (150 – 250 ms) time window (100ms in width,  
150 regularization=0.05).

151 Correlation coefficients for comparing the actual and predicted ERFs were calculated using the  
152 corrcoef function (Pearson correlation) in MATLAB 2017a for each individual, condition and node.

153 Time-frequency analysis was performed in SPM12 using a multi-taper method with 100 ms windows  
154 overlapped by 5 ms and a bandwidth of 3. Frequency bands were split into alpha (8 – 13 Hz), beta  
155 (14 – 29 Hz), low gamma (30 – 48 Hz) and high gamma (52 – 80 Hz).

### 156 *Neuronal Modelling: an extended canonical microcircuit model*

157 We used conductance-based canonical mean field (CMM) models for evoked responses (Kiebel et al.,  
158 2008) utilising canonical microcircuit models (SPM12, DCM10). This approach to  
159 neurophysiologically informed modelling using DCM goes beyond descriptive biomarkers by  
160 providing a mechanistic link to realistic microscopic processes. A common approach in DCM is to  
161 invert the neuronal and spatial forward model as a single generative model, to solve the source  
162 reconstruction and biophysical modelling problems jointly by fitting the DCM to sensor data.  
163 However, we modelled source specific responses to suppress conditional dependencies between the  
164 neuronal parameters and the parameters of a spatial forward model. This affords more efficient  
165 estimators of neuronal parameters, providing the source reconstruction is sufficiently precise given  
166 the spatial topography of the network of interest. This has the advantage of compatibility with  
167 multiple studies of this task (Muthukumaraswamy et al., 2015; Gilbert and Moran, 2016; Shaw et al.,  
168 2017, 2018), including MEG and electrocorticography studies; the chosen network was based on the  
169 published bilateral A1, STG, IFG networks associated with the generation of the MMN response.  
170 Since this spatial element of the inverse problem was constrained, it is computationally more  
171 appropriate to source localise using SPM with prior expected sources. The subsequent DCM was  
172 then run on these virtual electrodes.

173 The DCM included a homologous conductance-based neural-mass model at each of the six  
174 anatomical locations, as shown in Figure 1. They comprised 6 cell modules: a superficial pyramidal  
175 module (sp), a deep cortico-cortical pyramidal module (dp), a thalamic-projection pyramidal module  
176 (tp), a granular stellate module (ss) and separate supragranular and infragranular interneuron  
177 populations (si & di). Excitatory autapses existed for all excitatory cell modules and all modules were  
178 also governed by an inhibitory self-gain function that provided tonic inhibition to each module. The



179 intrinsic connectivities are shown in Fig. 1a: note the excitatory conductances based on AMPA and  
180 NMDA and inhibitory GABA-A and GABA-B conductances. The model is an extension of the SPM  
181 conductance-based CMM model (SPM12, 2013): inclusion of separate supra- and infra-granular  
182 interneuron populations creates a more biophysically realistic model that allows a greater flexibility  
183 of independence of deep and superficial activity than in previous work (Bhatt et al., 2016; Shaw et  
184 al., 2018; Spriggs et al., 2018). Additionally, the new 'tp' population expressed a hyperpolarization-  
185 activated cation current (H-current) and a non-inactivating potassium current (M-current) to provide  
186 surrogate intrinsic dynamics involved in the characteristic bursting behaviour of these cells. This,  
187 coupled with a different cell capacitance, differentiated the intrinsic activation of the 'tp' population  
188 from the 'dp' population. The populations also differed in their extrinsic connectivities, with 'dp'  
189 populations forming cortico-cortical connections and 'tp' populations allowing for cortico-  
190 thalamocortical connections. Thalamic activity was not specifically modelled but is represented by  
191 an 80 ms delay in connectivity.

192 Extrinsic connectivity between the six nodes is shown in Fig. 1b, with the detailed extrinsic  
193 population connections shown in Fig. 1c. In keeping with the established principle of differential  
194 cortical laminar projections of feed-forwards vs feedback connectivity (Bastos et al., 2012), backward  
195 connections are facilitated by the 'dp' cells terminating on 'sp' and 'si' cells, whilst forward  
196 connections run from 'sp' cells to 'ss' cells. Cortico-thalamo-cortical connections originate from 'tp'  
197 cells and terminate following a thalamic delay at layer 4 'ss' cells. The presence or absence of  
198 connections between nodes was based on the fully connected models from Phillips et al., (2015) and  
199 Shaw et al., (2019), which in turn were derived from Garrido et al., (2008). This was used for the  
200 basis of an iterative process to find the most likely reduced model (described below).

201 A Gaussian kernel (peak 60 ms, half-width 8 ms) represented auditory input to layer 4 stellates in  
202 bilateral auditory and inferior frontal cortex.

203 *Bayesian Modelling and Statistical Analysis:*

204 We used Bayesian model inversion and selection to identify the best explanation for subject-specific  
205 data, in terms of neuronal and biophysical parameters. Parametric Empirical Bayes was used for  
206 group inferences and to examine drug effects.

207 The DCM was inverted to source-reconstructed ERF data for the 6 nodes for each subject. Data were  
208 filtered between 0–48 Hz and a Tukey window was applied that did not attenuate signals 50 ms  
209 before or 350 ms after stimuli. Model inversion was run separately for the standard and deviant  
210 trials and passed to second level Parametric Empirical Bayesian with contrasts for both trial types  
211 and drug conditions. All intrinsic and extrinsic AMPA, NMDA and GABA-A conductance scalings could  
212 vary independently in a manner that assumed symmetry between the two hemispheres. The prior  
213 means and permitted variances are summarised in Table 1.

214 Variational Bayesian statistics using the Laplace approximation determined the probable parameter  
215 space given the neuronal model and the data (Friston et al., 2007). The full model parameter space  
216 was reduced by iteratively searching for dependencies in this parameter space and systematically  
217 removing parameters not contributing to the free energy of the system (Henson et al., 2011). The  
218 optimised reduced model comprises all those parameters and connections found to contribute  
219 significantly to the system temporal dynamics. The parameter distributions from this reduced model  
220 were used to create a Bayesian average model of parameters that differ significantly across the  
221 contrasts of trial types and drug conditions. The process flow is summarised in Fig 1e.

222 Frequentist statistical methods quoted in the main text used MATLAB (2017a, Mathworks, Natick,  
223 MA). Classification of data into the placebo and drug conditions used a linear SVM in the  
224 Classification Learner Application in MATLAB 2017a (Mathworks, Natick, MA) with 5-fold cross-  
225 validation approach.

226 *Code Accessibility:* The custom neuronal model used to generate these results is available at  
227 [address on acceptance] and works in conjunction with SPM12.

228

## 229 Results

### 230 *Event related fields and induced spectral power*

231 Event related responses to standard and deviant trials were in line with previous findings (Hughes  
232 and Rowe, 2013; Phillips et al., 2015, 2016) (Fig. 2a, first and second rows) and show the expected  
233 M100, the primary response after the onset of a tone (80-120 ms), a difference signal (MMN)  
234 between the standard and deviant trials (150-250 ms) and an M300 visible in frontal nodes (250-380  
235 ms). The M100 was significantly reduced by tiagabine on standard and deviant trials, in left temporal  
236 nodes (A1, and STG  $p < 0.05$ , paired t-test), whereas the later response leading into the M300 was  
237 significantly reduced only on deviant trials in L/R IFG ( $p < 0.05$ ).

238 The difference waveform (i.e. the deviant – the standard) reveals a typical biphasic MMN between  
239 150-250ms, observed in primary auditory cortex and STG (Fig. 2a, third row). Tiagabine significantly  
240 reduced the second peak of the MMN ( $p < 0.05$ ) with bilateral IFG nodes and RSTG showing  
241 reductions in the first peak of the mismatch response on tiagabine ( $p < 0.05$ ). As with the deviant  
242 response, LIFG showed a significant reduction of the later MMN peak and the M300 on tiagabine  
243 ( $p < 0.05$ ).

244 The temporal profile of spectral power differences (see Methods for time-frequency analysis)  
245 matched that of the ERFs, including spectral counterparts to M100, MMN, continuing through the  
246 M300 window (Fig. 2b&c). During the M100, alpha-power (8-12 Hz) decreases on tiagabine were  
247 localized to temporal cortex and beta (14-29 Hz) decreases more prominently to posterior temporal  
248 cortex. During the MMN, increases in low and high gamma (30-48 Hz and 52-80 Hz respectively)  
249 were observed broadly across right frontal cortex, including IFG. Low gamma also showed increases  
250 in right temporal cortex.

251 Such changes in the observed spatiotemporal physiology on tiagabine will be dependent on changes  
252 in local and global network connectivity. The extended conductance-based dynamic causal model  
253 was therefore used to infer the causes of the observed physiological changes.

254 *The Dynamical Causal Model:*

255 Fig. 3 demonstrates the evoked-response generated by the conductance-based dynamic causal  
256 model and the observed evoked-response at each node, for both drug conditions. The optimal  
257 model across the group in terms of connections and synaptic parameters, is determined by  
258 Parametric Empirical Bayes (see methods). Fig 3b shows the correlation between generated and  
259 observed data, for both standards' and deviants' responses, for both drug conditions at each node.  
260 Boxplots indicate the spread of single-subject correlations across the group (open circles are  
261 outliers), and black closed circles indicate the correlation of the mean response. Note how the  
262 periods of change between the placebo and drug conditions (black lines in Fig 3a) are accurately  
263 generated (cf. 'predicted') by the model, with a high match to the observed data in Fig 2a.

264 The modelled responses are explained in terms of the parameters of the optimised model. Using  
265 parametric empirical Bayes, model parameters were compared across the standard and deviant  
266 conditions, as well as across the placebo and tiagabine conditions. Figure 4 shows the effect of  
267 tiagabine on the intrinsic GABAergic connectivity, assuming symmetry (three bilateral averaged  
268 nodes are shown). We confirmed that tiagabine significantly increases tonic GABAergic inhibition  
269 (posterior probability given for each parameter in Fig. 4a). This was seen primarily in the deep layer  
270 pyramidal and interneuron populations (Fig 4a).

271 In keeping with the functional differentiation of upper versus lower levels in a hierarchical neural  
272 network with backwards-prediction and forward-prediction error, there was an interaction between  
273 the effects of tiagabine and condition between regions: Fig 4b compares GABA-A conductance  
274 scaling on deep interneurons between placebo and tiagabine conditions, plotted for each individual.

275 The differences were significant (standard paired t-test,  $p=1.1e-8$ ) between the two groups in  
276 primary auditory areas for the standard condition, and in IFG for the deviant condition.

277 The correlation between tonic and phasic inhibition was also explored for each region and condition  
278 and a strong negative relationship was found between the tonic inhibition of deep inhibitory cells  
279 and their phasic inhibition onto cortico-thalamic cells (Fig. 4c  $p=9.0e-8$ , Bonferroni corrected).

280 Finally, we used the estimated parameters for the 20 individuals in a linear support vector machine  
281 with 5-fold cross-validation to classify the conditions under which data were acquired and for which  
282 the models were therefore optimised. Parameter based classification reached 92.5% accuracy.

283

## 284 Discussion

285 The principle insights from this study are (i): an extended conductance-based canonical mean-field  
286 method of dynamic causal modelling (“ext-DCM”) is tractable and accurate for generating event-  
287 related fields that match those observed by magnetoencephalography; and (ii) we confirmed the  
288 modulation of GABAergic dynamics by the GABA-reuptake inhibitor tiagabine, opening the way for  
289 psychopharmacological studies in health and disease with the mechanistic precision afforded by  
290 using ext-DCMs as generative models.

291 We demonstrate that key features of the intrinsic connectivity within-regions changes across  
292 conditions in simple MMN paradigm, but they are of generalised relevance to hierarchical network  
293 models of cognition such as speech (Cope et al., 2018), semantic (Adams et al., 2019) and visual  
294 perception (Muthukumaraswamy *et al.*, 2013). Moreover, the laminar and pharmacological  
295 specificity provided by the ext-DCM has the potential to quantify neuropathology in dementia,  
296 developmental and psychiatric disorders (Duyckaerts et al., 1986; Kinoshita et al., 1996; Ferrer,  
297 1999; Ji et al., 2018; Shaw et al., 2018).

298 In the following sections, we first discuss how MEG quantifies the effects of tiagabine on cortical  
299 dynamics. We then consider additional insights from biophysically informed DCMs of hierarchical  
300 brain networks, illustrating mechanistic explanations of the observed population dynamics.

### 301 *Understanding the MMN in terms of short-term plasticity.*

302 The drug modulation of GABA resulted in complex dynamics across the trial types, implicating both  
303 local tonic-phasic effects and global hierarchical effects. Repetitive activation with the same stimulus  
304 results in a dampening effect on the ERF (reduction in N1/N2 by 6<sup>th</sup> repetition), Fig 2. We predicted  
305 higher tonic inhibition in the deep layers during the repetition state – namely, increased tonic  
306 inhibition in cortico-cortical circuitry in prefrontal cortex and cortico-thalamo-cortical circuitry in  
307 temporal cortex – which we interpret as local short-term plastic changes in deep-layer inhibition

308 (Knott et al., 2002; Hensch, 2005; Jääskeläinen et al., 2007) that regulates salient information  
309 (Mongillo et al., 2018).

310 The model confirmed that the effect of tiagabine was to increase extracellular GABA concentrations  
311 with a marked increase in tonic inhibition, associated with overspill of GABA onto extra-synaptic  
312 receptors (Semyanov et al., 2004). The effect was modulated differently in primary and secondary  
313 processing areas: for tonic inhibition of deep interneurons the drug's efficacy was highest in  
314 prefrontal cortex for deviant trials and in auditory cortex for standard trials. Figure 4b shows that  
315 whereas a drop in deep interneuron tonic inhibition was observed on deviant trials, tiagabine  
316 abolished the effect. We speculate that the drop in tonic inhibition at the presentation of a deviant  
317 tone relates to homeostatic competition between phasic and tonic inhibition (Wu et al., 2013), with  
318 phasic activation of deep-layer projections being necessary for feedback of top-down information on  
319 context. Increasing tonic inhibition likely decreases the interneuron population activation (Semyanov  
320 et al., 2004), leading to decreased phasic inhibition onto deep pyramidal cells. This relationship was  
321 confirmed and is shown in Fig 4c between tonic inhibition of deep IFG interneurons and phasic  
322 inhibition of deep IFG thalamic-projection neurons.

323 *GABA-ergic modulation of evoked and induced responses.*

324 Tiagabine has a range of effects on oscillatory dynamics, in beta and gamma ranges, which may  
325 influence behaviour (Coenen et al., 1995; Magazzini et al., 2016; Port et al., 2017; Wyss et al., 2017).  
326 It remains a challenge to relate systemic drug effects with such local frequency-spectral phenomena.  
327 However, it has been proposed that beta-band activity is associated with infragranular cortical  
328 projection neurons with intrinsically bursting profiles (Groh et al., 2010; Roopun et al., 2010; Kim et  
329 al., 2015). Here we found that, on tiagabine, induced beta-band activity was reduced in temporal  
330 areas. This relates to the model prediction that tonic inhibition is increased on intrinsically bursting  
331 thalamic projection neurons in STG, and not phasic inhibition, which could increase rebound  
332 bursting via intrinsic M- and H-currents (Roopun et al., 2008; Roopun et al., 2008b).

333 Conversely, it has been shown that gamma-band activity is dependent on the GABA-A receptor  
334 activation and the phasic interplay of interneuron-pyramidal cell networks, particularly in the  
335 superficial layers (Buffalo et al., 2011; Whittington et al., 2011). Our evidence from the mismatch  
336 temporal window (Fig. 2b) indicates peak gamma increases occurring at the start of the mismatch  
337 period. This is consistent with thalamic input (Di and Barth, 1992, 1993; Sukov and Barth, 2001)  
338 leading to an envelope of gamma activity in the superficial layers of cortex during audition  
339 (Metherate and Cruikshank, 1999).

340 Overall, the observed dynamics and the model posterior parameters are consistent with our  
341 knowledge of network activation within the context of beta- and gamma- rhythm generation in  
342 cortex and how increases in endogenous GABA could manifest.

#### 343 *Generative models of drug effects on cognitive physiology.*

344 The drug's effect was largely confined to deep cells that in turn connect to superficial cells, with  
345 tiagabine reducing deep-layer influences on superficial layers. As we modelled evoked activity it is  
346 difficult to speculate on how this influences gamma activity across the network, however a reduction  
347 in deep-layer influence may increase local cortical processing associated with gamma-band activity  
348 in the superficial layers. Under the assumption that their GABA levels are lower in older versus  
349 younger adults, tiagabine acts restoratively to increase gamma-band activity by altering the balance  
350 of activity across layers. This is corroborated with lower frequency band activity, dependent on  
351 GABA (Mathias et al., 2001). Finally, we speculate that the reduced M100 seen on tiagabine is a  
352 consequence of the widespread increased tonic inhibition predicted by the model (Fig. 4), causing a  
353 general reduction in local population activity.

#### 354 *Study limitations.*

355 Our study was motivated by the need for mechanistic studies of human cortical function, underlying  
356 cognition, disease and therapeutics. Despite support for our three principal hypotheses, and  
357 background validation studies (Moran et al., 2014), evidence from one study may not generalise to



358 other tasks and populations. There are some study-specific considerations that limit our inferences,  
359 in relation to our participants, our model, and drug of choice. For example, our participants were  
360 healthy, but they were older than those studied by Nutt et al (2015), and therefore have normal age  
361 related changes in GABA (Gao et al., 2013; Eavri et al., 2018), that could interact with the effects of  
362 tiagabine (Nutt et al., 2015).

363 Our neuronal model provides a simplified substrate for the neurophysiological processes. It is more  
364 detailed than previously canonical microcircuit convolution models (Moran et al., 2013), in an effort  
365 to improve the modelling of specific dynamics in the form of cell populations, their differing  
366 connectivities, synaptic time constants and voltage-gated conductances relevant to this cortical  
367 micro-circuitry and task. The extended model can produce a wide spectrum of oscillatory responses,  
368 including both superficial gamma rhythms and deep beta rhythms (Roopun et al., 2006; Kramer et  
369 al., 2008; Whittington et al., 2011). It can incorporate delayed activity associated with local, cortico-  
370 cortical and cortico-thalamo-cortical connections. Currently, this system is a simplified network  
371 acting as a neural mass, and as such it can represent relevant cortical interactions involved in ERF  
372 generation in the context of this task and study. It does this by allowing forward and backward  
373 modulation of activity between deep and superficial layers, where synaptic time constants  
374 corroborate with standard GABA, NMDA and AMPA receptor decays. The six specified nodes are  
375 commonly cited in the literature in the context of this task (Garrido et al., 2009b; Phillips et al.,  
376 2015). Although they are not a complete representation of possible network configurations, they  
377 have nevertheless been shown to capture critical aspects of cortical function: here the network has  
378 been supplemented with modelled exogenous and endogenous inputs via thalamus. Where  
379 parameters derived from DCMs are used for frequentist statistical tests, they have excellent  
380 reliability across sessions and sites, and similar power to fMRI and EEG studies (Rowe et al., 2010;  
381 Goulden et al., 2012; Bernal-Casas et al., 2013). However, such a frequentist approach is obviated by  
382 the direct inferences on posterior probability inherent in the Bayesian inference of DCM, and the use  
383 of Parametric Empirical Bayes in particular for group studies.

384 tiagabine is a relatively specific blocker of GAT-1 at the concentrations used, but does not distinguish  
385 between the mechanisms activated by GABA (Bowery et al., 1987; Mody and Pearce, 2004; Lee and  
386 Maguire, 2014). The timing of the magnetoencephalography coincided with expected peak plasma  
387 levels, but levels may vary between individuals and future studies could in principle include levels as  
388 a covariate of interest, or model time-varying responses in relation to drug levels  
389 (Muthukumaraswamy et al., 2013b).

390 In conclusion, we have used a conductance-based model of cortical neuronal dynamics to study  
391 GABA-ergic interactions and probe laminar-specific physiological responses to tiagabine. The model  
392 accurately generated physiological data that matched the MEG responses and confirmed the effect  
393 of tiagabine on tonic GABA-A inhibitory gain within frontal and temporal cortical circuits. Our data  
394 provide support for mechanistic studies of neurological disorders, including but not limited to  
395 GABAergic impairments (Murley and Rowe, 2018). They also point to new approaches for  
396 experimental medicine studies in humans that aim for the laminar, cellular or synaptic precision  
397 made possible in new generations of dynamic causal models.

398

399 **Acknowledgements**

400 This work was funded by the Wellcome Trust (103838), the National Institute for Health Research  
401 Cambridge Biomedical Research Centre and the Medical Research Council (MC\_U105597119 &  
402 MC\_U\_00005/12) and Holt Fellowship. We thank the PSP Association & FTD Support Group for  
403 raising awareness of the study.

404

405

406 **References**

- 407 Adams NE, Teige C, Mollo G, Karapanagiotidis T, Cornelissen PL, Smallwood J, Traub RD, Jefferies E,  
408 Whittington MA (2019) Theta/delta coupling across cortical laminae contributes to semantic  
409 cognition. *J Neurophysiol*:jn.00686.2018 Available at:  
410 <https://www.physiology.org/doi/10.1152/jn.00686.2018> [Accessed January 31, 2019].
- 411 Bastos AM, Usrey WM, Adams RA, Mangun GR, Fries P, Friston KJ (2012) Canonical Microcircuits for  
412 Predictive Coding. *Neuron* 76:695–711 Available at:  
413 <https://www.sciencedirect.com/science/article/pii/S0896627312009592> [Accessed January 15,  
414 2019].
- 415 Bernal-Casas D, Balaguer-Ballester E, Gerchen MF, Iglesias S, Walter H, Heinz A, Meyer-Lindenberg A,  
416 Stephan KE, Kirsch P (2013) Multi-site reproducibility of prefrontal–hippocampal connectivity  
417 estimates by stochastic DCM. *Neuroimage* 82:555–563 Available at:  
418 <https://www.sciencedirect.com/science/article/pii/S1053811913006307> [Accessed March 1,  
419 2019].
- 420 Bhatt MB, Bowen S, Rossiter HE, Dupont-Hadwen J, Moran RJ, Friston KJ, Ward NS (2016)  
421 Computational modelling of movement-related beta-oscillatory dynamics in human motor  
422 cortex. *Neuroimage* 133:224–232 Available at:  
423 <https://www.sciencedirect.com/science/article/pii/S1053811916001981#f0005> [Accessed  
424 January 15, 2019].
- 425 Boly M, Garrido MI, Gosseries O, Bruno M-A, Boveroux P, Schnakers C, Massimini M, Litvak V,  
426 Laureys S, Friston K (2011) Preserved Feedforward But Impaired Top-Down Processes in the  
427 Vegetative State. *Science (80- )* 332:858–862 Available at:  
428 <http://www.ncbi.nlm.nih.gov/pubmed/21566197> [Accessed February 26, 2019].
- 429 Bordas C, Kovacs A, Pal B (2015) The M-current contributes to high threshold membrane potential  
430 oscillations in a cell type-specific way in the pedunculopontine nucleus of mice. *Front Cell*

- 431           Neurosci 9:121 Available at:
- 432           <http://journal.frontiersin.org/article/10.3389/fncel.2015.00121/abstract> [Accessed March 1,
- 433           2019].
- 434   Bowerly NG, Hudson AL, Price GW (1987) GABAA and GABAB receptor site distribution in the rat
- 435           central nervous system. *Neuroscience* 20:365–383 Available at:
- 436           <https://www.sciencedirect.com/science/article/pii/0306452287900984> [Accessed September
- 437           11, 2018].
- 438   Buffalo EA, Fries P, Landman R, Buschman TJ, Desimone R (2011) Laminar differences in gamma and
- 439           alpha coherence in the ventral stream. *Proc Natl Acad Sci U S A* 108:11262–11267.
- 440   Castro-Alamancos MA, Connors BW (1996) Cellular mechanisms of the augmenting response: short-
- 441           term plasticity in a thalamocortical pathway. *J Neurosci* 16:7742–7756 Available at:
- 442           <http://www.ncbi.nlm.nih.gov/pubmed/8922430> [Accessed June 19, 2018].
- 443   Coenen AML, Blezer EHM, van Luijtelaar ELJM (1995) Effects of the GABA-uptake inhibitor tiagabine
- 444           on electroencephalogram, spike-wave discharges and behaviour of rats. *Epilepsy Res* 21:89–94
- 445           Available at: <https://www.sciencedirect.com/science/article/pii/0920121195000153> [Accessed
- 446           February 26, 2019].
- 447   Di S, Barth DS (1992) The functional anatomy of middle-latency auditory evoked potentials:
- 448           thalamocortical connections. *J Neurophysiol* 68:425–431 Available at:
- 449           <http://www.ncbi.nlm.nih.gov/pubmed/1382119> [Accessed September 5, 2018].
- 450   Di S, Barth DS (1993) Binaural vs. monaural auditory evoked potentials in rat neocortex. *Brain Res*
- 451           630:303–314 Available at:
- 452           <https://www.sciencedirect.com/science/article/pii/000689939390670I> [Accessed September 5,
- 453           2018].
- 454   Duyckaerts C, Hauw J-J, Bastenaire F, Piette F, Poulain C, Rainsard V, Javoy-Agid F, Berthaux P (1986)

- 455 Laminar distribution of neocortical senile plaques in senile dementia of the alzheimer type.  
456 Acta Neuropathol 70:249–256 Available at: <http://link.springer.com/10.1007/BF00686079>  
457 [Accessed January 15, 2019].
- 458 Eavri R, Shepherd J, Welsh CA, Flanders GH, Bear M, Nedivi E (2018) Interneuron simplification and  
459 loss of structural plasticity as markers of aging-related functional decline. J Neurosci:0808-18  
460 Available at: <http://www.ncbi.nlm.nih.gov/pubmed/30108129> [Accessed August 22, 2018].
- 461 Ferrer I (1999) Neurons and their dendrites in frontotemporal dementia. Dement Geriatr Cogn  
462 Disord 10 Suppl 1:55–60 Available at: <http://www.ncbi.nlm.nih.gov/pubmed/10436342>  
463 [Accessed August 22, 2018].
- 464 Friston K, Mattout J, Trujillo-Barreto N, Ashburner J, Penny W (2007) Variational free energy and the  
465 Laplace approximation. Neuroimage 34:220–234 Available at:  
466 <https://www.sciencedirect.com/science/article/pii/S1053811906008822> [Accessed May 1,  
467 2018].
- 468 Gao F, Edden RAE, Li M, Puts NAJ, Wang G, Liu C, Zhao B, Wang H, Bai X, Zhao C, Wang X, Barker PB  
469 (2013) Edited magnetic resonance spectroscopy detects an age-related decline in brain GABA  
470 levels. Neuroimage 78:75–82 Available at:  
471 <https://www.sciencedirect.com/science/article/pii/S105381191300339X> [Accessed September  
472 4, 2018].
- 473 Garrido MI, Friston KJ, Kiebel SJ, Stephan KE, Baldeweg T, Kilner JM (2008) The functional anatomy of  
474 the MMN: a DCM study of the roving paradigm. Neuroimage 42:936–944 Available at:  
475 <https://linkinghub.elsevier.com/retrieve/pii/S1053811908006484> [Accessed January 8, 2019].
- 476 Garrido MI, Kilner JM, Kiebel SJ, Stephan KE, Baldeweg T, Friston KJ (2009a) Repetition suppression  
477 and plasticity in the human brain. Neuroimage 48:269–279 Available at:  
478 <https://www.sciencedirect.com/science/article/pii/S1053811909006661> [Accessed January 8,  
479 2019].

- 480 Garrido MI, Kilner JM, Stephan KE, Friston KJ (2009b) The mismatch negativity: a review of  
481 underlying mechanisms. *Clin Neurophysiol* 120:453–463 Available at:  
482 <http://www.ncbi.nlm.nih.gov/pubmed/19181570> [Accessed May 1, 2018].
- 483 Gilbert JR, Moran RJ (2016) Inputs to prefrontal cortex support visual recognition in the aging brain.  
484 *Sci Rep* 6:31943 Available at: <http://www.nature.com/articles/srep31943> [Accessed January  
485 14, 2019].
- 486 Gilbert JR, Symmonds M, Hanna MG, Dolan RJ, Friston KJ, Moran RJ (2016) Profiling neuronal ion  
487 channelopathies with non-invasive brain imaging and dynamic causal models: Case studies of  
488 single gene mutations. *Neuroimage* 124:43–53 Available at:  
489 <https://www.sciencedirect.com/science/article/pii/S1053811915007788> [Accessed July 8,  
490 2019].
- 491 Goulden N, Elliott R, Suckling J, Williams SR, Deakin JFW, McKie S (2012) Sample Size Estimation for  
492 Comparing Parameters Using Dynamic Causal Modeling. *Brain Connect* 2:80–90 Available at:  
493 <http://www.liebertpub.com/doi/10.1089/brain.2011.0057> [Accessed March 1, 2019].
- 494 Groh A, Meyer HS, Schmidt EF, Heintz N, Sakmann B, Krieger P (2010) Cell-Type Specific Properties of  
495 Pyramidal Neurons in Neocortex Underlying a Layout that Is Modifiable Depending on the  
496 Cortical Area. *Cereb Cortex* 20:826–836 Available at:  
497 <http://www.ncbi.nlm.nih.gov/pubmed/19643810> [Accessed June 19, 2018].
- 498 Heers M, Chowdhury RA, Hedrich T, Dubeau F, Hall JA, Lina J-M, Grova C, Kobayashi E (2016)  
499 Localization Accuracy of Distributed Inverse Solutions for Electric and Magnetic Source Imaging  
500 of Interictal Epileptic Discharges in Patients with Focal Epilepsy. *Brain Topogr* 29:162–181  
501 Available at: <http://link.springer.com/10.1007/s10548-014-0423-1> [Accessed December 18,  
502 2018].
- 503 Hensch TK (2005) Critical period plasticity in local cortical circuits. *Nat Rev Neurosci* 6:877–888  
504 Available at: <http://www.nature.com/articles/nrn1787> [Accessed August 22, 2018].

- 505 Henson RN, Wakeman DG, Litvak V, Friston KJ (2011) A Parametric Empirical Bayesian Framework for  
506 the EEG/MEG Inverse Problem: Generative Models for Multi-Subject and Multi-Modal  
507 Integration. *Front Hum Neurosci* 5:76 Available at:  
508 <http://journal.frontiersin.org/article/10.3389/fnhum.2011.00076/abstract> [Accessed May 1,  
509 2018].
- 510 Hughes LE, Ghosh BCP, Rowe JB (2013) Reorganisation of brain networks in frontotemporal  
511 dementia and progressive supranuclear palsy. *NeuroImage Clin* 2:459–468 Available at:  
512 <https://www.sciencedirect.com/science/article/pii/S2213158213000302> [Accessed October 24,  
513 2018].
- 514 Hughes LE, Rowe JB (2013) The Impact of Neurodegeneration on Network Connectivity: A Study of  
515 Change Detection in Frontotemporal Dementia. *J Cogn Neurosci* 25:802–813 Available at:  
516 [http://www.mitpressjournals.org/doi/10.1162/jocn\\_a\\_00356](http://www.mitpressjournals.org/doi/10.1162/jocn_a_00356) [Accessed January 15, 2019].
- 517 Jääskeläinen IP, Ahveninen J, Belliveau JW, Raij T, Sams M (2007) Short-term plasticity in auditory  
518 cognition. *Trends Neurosci* 30:653–661 Available at:  
519 <https://www.sciencedirect.com/science/article/pii/S0166223607002585> [Accessed June 26,  
520 2018].
- 521 Ji E, Samuel S, Leboyer M, Guevara M, Guevara P, Poupon C, Grigis A, Houenou J (2018) T145.  
522 ALTERATIONS IN SUPERFICIAL WHITE MATTER IN THE FRONTAL CORTEX IN SCHIZOPHRENIA: A  
523 DWI STUDY USING A NOVEL ATLAS. *Schizophr Bull* 44:S172–S172 Available at:  
524 [https://academic.oup.com/schizophreniabulletin/article/44/suppl\\_1/S172/4957486](https://academic.oup.com/schizophreniabulletin/article/44/suppl_1/S172/4957486) [Accessed  
525 January 15, 2019].
- 526 Jiang X, Shen S, Cadwell CR, Berens P, Sinz F, Ecker AS, Patel S, Tolias AS (2015) Principles of  
527 connectivity among morphologically defined cell types in adult neocortex. *Science* (80- )  
528 350:aac9462-aac9462 Available at: <http://www.ncbi.nlm.nih.gov/pubmed/26612957> [Accessed  
529 March 1, 2019].



- 530 Kiebel SJ, Garrido MI, Moran RJ, Friston KJ (2008) Dynamic causal modelling for EEG and MEG. *Cogn*  
531 *Neurodyn* 2:121–136 Available at: <http://link.springer.com/10.1007/s11571-008-9038-0>  
532 [Accessed January 14, 2019].
- 533 Kim EJ, Juavinett AL, Kyubwa EM, Jacobs MW, Callaway EM (2015) Three Types of Cortical Layer 5  
534 Neurons That Differ in Brain-wide Connectivity and Function. *Neuron* 88:1253–1267 Available  
535 at: <https://www.sciencedirect.com/science/article/pii/S0896627315009812> [Accessed  
536 September 4, 2018].
- 537 Kinoshita A, Tomimoto H, Tachibana N, Suenaga T, Kawamata T, Kimura T, Akiguchi I, Kimura J (1996)  
538 A case of primary progressive aphasia with abnormally ubiquitinated neurites in the cerebral  
539 cortex. *Acta Neuropathol* 92:520–524 Available at:  
540 <http://link.springer.com/10.1007/s004010050555> [Accessed January 15, 2019].
- 541 Knott GW, Quairiaux C, Genoud C, Welker E (2002) Formation of dendritic spines with GABAergic  
542 synapses induced by whisker stimulation in adult mice. *Neuron* 34:265–273 Available at:  
543 <http://www.ncbi.nlm.nih.gov/pubmed/11970868> [Accessed January 3, 2019].
- 544 Kramer MA, Roopun AK, Carracedo LM, Traub RD, Whittington MA, Kopell NJ (2008) Rhythm  
545 Generation through Period Concatenation in Rat Somatosensory Cortex Friston KJ, ed. *PLoS*  
546 *Comput Biol* 4:e1000169 Available at: <https://dx.plos.org/10.1371/journal.pcbi.1000169>  
547 [Accessed February 26, 2019].
- 548 Lee V, Maguire J (2014) The impact of tonic GABAA receptor-mediated inhibition on neuronal  
549 excitability varies across brain region and cell type. *Front Neural Circuits* 8:3 Available at:  
550 <http://journal.frontiersin.org/article/10.3389/fncir.2014.00003/abstract> [Accessed June 27,  
551 2018].
- 552 Magazzini L, Muthukumaraswamy SD, Campbell AE, Hamandi K, Lingford-Hughes A, Myers JFM, Nutt  
553 DJ, Sumner P, Wilson SJ, Singh KD (2016) Significant reductions in human visual gamma  
554 frequency by the gaba reuptake inhibitor tiagabine revealed by robust peak frequency

- 555 estimation. *Hum Brain Mapp* 37:3882–3896 Available at:
- 556 <http://www.ncbi.nlm.nih.gov/pubmed/27273695> [Accessed February 26, 2019].
- 557 Marreiros AC, Pinotsis DA, Brown P, Friston KJ (2015) DCM, Conductance Based Models and Clinical  
558 Applications. In, pp 43–70. Springer, Cham. Available at: [http://link.springer.com/10.1007/978-](http://link.springer.com/10.1007/978-3-319-20037-8_3)  
559 [3-319-20037-8\\_3](http://link.springer.com/10.1007/978-3-319-20037-8_3) [Accessed January 15, 2019].
- 560 Mathias S, Wetter TC, Steiger A, Lancel M (2001) The GABA uptake inhibitor tiagabine promotes slow  
561 wave sleep in normal elderly subjects. *Neurobiol Aging* 22:247–253 Available at:  
562 <http://www.ncbi.nlm.nih.gov/pubmed/11182474> [Accessed May 1, 2018].
- 563 Metherate R, Cruikshank SJ (1999) Thalamocortical inputs trigger a propagating envelope of gamma-  
564 band activity in auditory cortex in vitro. *Exp Brain Res* 126:160–174 Available at:  
565 <http://link.springer.com/10.1007/s002210050726> [Accessed June 19, 2018].
- 566 Michalareas G, Vezoli J, van Pelt S, Schoffelen J-M, Kennedy H, Fries P (2016) Alpha-Beta and Gamma  
567 Rhythms Subserve Feedback and Feedforward Influences among Human Visual Cortical Areas.  
568 *Neuron* 89:384–397 Available at: <http://www.ncbi.nlm.nih.gov/pubmed/26777277> [Accessed  
569 March 1, 2019].
- 570 Mody I, Pearce RA (2004) Diversity of inhibitory neurotransmission through GABAA receptors.  
571 *Trends Neurosci* 27:569–575 Available at:  
572 <https://www.sciencedirect.com/science/article/pii/S0166223604002279> [Accessed September  
573 11, 2018].
- 574 Mongillo G, Rumpel S, Loewenstein Y (2018) Inhibitory connectivity defines the realm of excitatory  
575 plasticity. *Nat Neurosci* 21:1463–1470 Available at: [http://www.nature.com/articles/s41593-](http://www.nature.com/articles/s41593-018-0226-x)  
576 [018-0226-x](http://www.nature.com/articles/s41593-018-0226-x) [Accessed December 5, 2018].
- 577 Moran R, Pinotsis DA, Friston K (2013) Neural masses and fields in dynamic causal modeling. *Front*  
578 *Comput Neurosci* 7:57 Available at:

579 <http://journal.frontiersin.org/article/10.3389/fncom.2013.00057/abstract> [Accessed January 3,  
580 2019].

581 Moran RJ, Symmonds M, Dolan RJ, Friston KJ (2014) The Brain Ages Optimally to Model Its  
582 Environment: Evidence from Sensory Learning over the Adult Lifespan Sporns O, ed. PLoS  
583 Comput Biol 10:e1003422 Available at: <https://dx.plos.org/10.1371/journal.pcbi.1003422>  
584 [Accessed February 26, 2019].

585 Murley AG, Rowe JB (2018) Neurotransmitter deficits from frontotemporal lobar degeneration. Brain  
586 141:1263–1285 Available at: <https://academic.oup.com/brain/article/141/5/1263/4823510>  
587 [Accessed October 24, 2018].

588 Muthukumaraswamy SD, Myers JFM, Wilson SJ, Nutt DJ, Hamandi K, Lingford-Hughes A, Singh KD  
589 (2013a) Elevating Endogenous GABA Levels with GAT-1 Blockade Modulates Evoked but Not  
590 Induced Responses in Human Visual Cortex. Neuropsychopharmacology 38:1105–1112  
591 Available at: <http://www.nature.com/articles/npp20139> [Accessed May 1, 2018].

592 Muthukumaraswamy SD, Myers JFM, Wilson SJ, Nutt DJ, Lingford-Hughes A, Singh KD, Hamandi K  
593 (2013b) The effects of elevated endogenous GABA levels on movement-related network  
594 oscillations. Neuroimage 66:36–41 Available at:  
595 <https://www.sciencedirect.com/science/article/pii/S1053811912010579?via%3Dihub>  
596 [Accessed February 26, 2019].

597 Muthukumaraswamy SD, Shaw AD, Jackson LE, Hall J, Moran R, Saxena N (2015) Evidence that  
598 Subanesthetic Doses of Ketamine Cause Sustained Disruptions of NMDA and AMPA-Mediated  
599 Frontoparietal Connectivity in Humans. J Neurosci 35:11694–11706 Available at:  
600 <http://www.ncbi.nlm.nih.gov/pubmed/26290246> [Accessed January 14, 2019].

601 Naatanen R, Kujala T, Kreegipuu K, Carlson S, Escera C, Baldeweg T, Ponton C (2011) The mismatch  
602 negativity: an index of cognitive decline in neuropsychiatric and neurological diseases and in  
603 ageing. Brain 134:3435–3453 Available at: <https://academic.oup.com/brain/article->

- 604           lookup/doi/10.1093/brain/awr064 [Accessed February 26, 2019].
- 605   Nutt D, Wilson S, Lingford-Hughes A, Myers J, Papadopoulos A, Muthukumaraswamy S (2015)
- 606           Differences between magnetoencephalographic (MEG) spectral profiles of drugs acting on
- 607           GABA at synaptic and extrasynaptic sites: A study in healthy volunteers. *Neuropharmacology*
- 608           88:155–163 Available at:
- 609           <https://www.sciencedirect.com/science/article/pii/S0028390814003001> [Accessed January 3,
- 610           2019].
- 611   Pascual-Marqui RD, Michel CM, Lehmann D (1994) Low resolution electromagnetic tomography: a
- 612           new method for localizing electrical activity in the brain. *Int J Psychophysiol* 18:49–65 Available
- 613           at: <http://linkinghub.elsevier.com/retrieve/pii/016787608490014X> [Accessed December 18,
- 614           2018].
- 615   Phillips HN, Blenkman A, Hughes LE, Bekinschtein TA, Rowe JB (2015) Hierarchical Organization of
- 616           Frontotemporal Networks for the Prediction of Stimuli across Multiple Dimensions. *J Neurosci*
- 617           35:9255–9264 Available at: <http://www.ncbi.nlm.nih.gov/pubmed/26109651> [Accessed May 1,
- 618           2018].
- 619   Phillips HN, Blenkman A, Hughes LE, Kochen S, Bekinschtein TA, Cam-CAN, Rowe JB (2016)
- 620           Convergent evidence for hierarchical prediction networks from human electrocorticography
- 621           and magnetoencephalography. *Cortex* 82:192–205 Available at:
- 622           <https://www.sciencedirect.com/science/article/pii/S0010945216301058#fig3> [Accessed
- 623           January 15, 2019].
- 624   Port RG, Gaetz W, Bloy L, Wang D-J, Blaskey L, Kuschner ES, Levy SE, Brodtkin ES, Roberts TPL (2017)
- 625           Exploring the relationship between cortical GABA concentrations, auditory gamma-band
- 626           responses and development in ASD: Evidence for an altered maturational trajectory in ASD.
- 627           *Autism Res* 10:593–607 Available at: <http://www.ncbi.nlm.nih.gov/pubmed/27696740>
- 628           [Accessed February 26, 2019].

- 629 Razi A, Kahan J, Rees G, Friston KJ (2015) Construct validation of a DCM for resting state fMRI.  
630 Neuroimage 106:1–14 Available at:  
631 <https://www.sciencedirect.com/science/article/pii/S1053811914009446> [Accessed September  
632 13, 2018].
- 633 Roopun AK, Kramer MA, Carracedo LM, Kaiser M, Davies CH, Traub RD, Kopell NJ, Whittington MA  
634 (2008a) Period concatenation underlies interactions between gamma and beta rhythms in  
635 neocortex. Front Cell Neurosci 2:1 Available at:  
636 <http://journal.frontiersin.org/article/10.3389/neuro.03.001.2008/abstract> [Accessed January 3,  
637 2019].
- 638 Roopun AK, Kramer MA, Carracedo LM, Kaiser M, Davies CH, Traub RD, Kopell NJ, Whittington MA  
639 (2008b) Temporal interactions between cortical rhythms. Front Neurosci 2:145–154 Available  
640 at: <http://journal.frontiersin.org/article/10.3389/neuro.01.034.2008/abstract> [Accessed  
641 January 3, 2019].
- 642 Roopun AK, LeBeau FEN, Rammell J, Cunningham MO, Traub RD, Whittington MA (2010) Cholinergic  
643 neuromodulation controls directed temporal communication in neocortex in vitro. Front  
644 Neural Circuits 4:8 Available at:  
645 <http://journal.frontiersin.org/article/10.3389/fncir.2010.00008/abstract> [Accessed June 19,  
646 2018].
- 647 Roopun AK, Middleton SJ, Cunningham MO, LeBeau FEN, Bibbig A, Whittington MA, Traub RD (2006)  
648 A beta2-frequency (20-30 Hz) oscillation in nonsynaptic networks of somatosensory cortex.  
649 Proc Natl Acad Sci U S A 103:15646–15650 Available at:  
650 <http://www.ncbi.nlm.nih.gov/pubmed/17030821> [Accessed February 26, 2019].
- 651 Rowe JB, Hughes LE, Barker RA, Owen AM (2010) Dynamic causal modelling of effective connectivity  
652 from fMRI: Are results reproducible and sensitive to Parkinson’s disease and its treatment?  
653 Neuroimage 52:1015–1026 Available at:

- 654 <https://www.sciencedirect.com/science/article/pii/S105381190901369X> [Accessed March 1,  
655 2019].
- 656 Semyanov A, Walker MC, Kullmann DM, Silver RA (2004) Tonicly active GABAA receptors:  
657 modulating gain and maintaining the tone. *Trends Neurosci* 27:262–269 Available at:  
658 <https://www.sciencedirect.com/science/article/pii/S0166223604000906?via%3Dihub>  
659 [Accessed June 18, 2018].
- 660 Shaw AD, Hughes LE, Moran RJ, Coyle-Gilchrist I, Rittman T, Rowe JB (2018) In vivo assay of cortical  
661 microcircuitry in frontotemporal dementia: a platform for experimental medicine studies.  
662 bioRxiv:416388 Available at: <https://www.biorxiv.org/content/early/2018/09/13/416388.short>  
663 [Accessed November 7, 2018].
- 664 Shaw AD, Moran RJ, Muthukumaraswamy SD, Brealy J, Linden DE, Friston KJ, Singh KD (2017)  
665 Neurophysiologically-informed markers of individual variability and pharmacological  
666 manipulation of human cortical gamma. *Neuroimage* 161:19–31 Available at:  
667 <http://www.ncbi.nlm.nih.gov/pubmed/28807873> [Accessed January 14, 2019].
- 668 Shipp S (2016) Neural Elements for Predictive Coding. *Front Psychol* 7:1792 Available at:  
669 <http://journal.frontiersin.org/article/10.3389/fpsyg.2016.01792/full> [Accessed January 14,  
670 2019].
- 671 Spriggs MJ, Sumner RL, McMillan RL, Moran RJ, Kirk IJ, Muthukumaraswamy SD (2018) Indexing  
672 sensory plasticity: Evidence for distinct Predictive Coding and Hebbian learning mechanisms in  
673 the cerebral cortex. *Neuroimage* 176:290–300 Available at:  
674 <https://www.sciencedirect.com/science/article/pii/S105381191830380X> [Accessed January 15,  
675 2019].
- 676 Stephan KE, Iglesias S, Heinzle J, Diaconescu AO (2015) Translational Perspectives for Computational  
677 Neuroimaging. *Neuron* 87:716–732 Available at:  
678 <https://www.sciencedirect.com/science/article/pii/S0896627315006303> [Accessed February

- 679 26, 2019].
- 680 Stephan KE, Kasper L, Harrison LM, Daunizeau J, den Ouden HEM, Breakspear M, Friston KJ (2008)
- 681 Nonlinear dynamic causal models for fMRI. *Neuroimage* 42:649–662 Available at:
- 682 <https://www.sciencedirect.com/science/article/pii/S1053811908005983> [Accessed February
- 683 26, 2019].
- 684 Sukov W, Barth DS (2001) Cellular mechanisms of thalamically evoked gamma oscillations in auditory
- 685 cortex. *J Neurophysiol* 85:1235–1245 Available at:
- 686 <http://www.physiology.org/doi/10.1152/jn.2001.85.3.1235> [Accessed June 18, 2018].
- 687 Symmonds M, Moran CH, Leite MI, Buckley C, Irani SR, Stephan KE, Friston KJ, Moran RJ (2018) Ion
- 688 channels in EEG: isolating channel dysfunction in NMDA receptor antibody encephalitis. *Brain*
- 689 141:1691–1702 Available at: <https://academic.oup.com/brain/article/141/6/1691/4990439>
- 690 [Accessed July 8, 2019].
- 691 Whittington M., Traub R., Kopell N, Ermentrout B, Buhl E. (2000) Inhibition-based rhythms:
- 692 experimental and mathematical observations on network dynamics. *Int J Psychophysiol*
- 693 38:315–336.
- 694 Whittington MA, Cunningham MO, LeBeau FEN, Racca C, Traub RD (2011) Multiple origins of the
- 695 cortical gamma rhythm. *Dev Neurobiol* 71:92–106 Available at:
- 696 <http://doi.wiley.com/10.1002/dneu.20814> [Accessed September 4, 2018].
- 697 Wu X, Huang L, Wu Z, Zhang C, Jiang D, Bai Y, Wang Y, Chen G (2013) Homeostatic competition
- 698 between phasic and tonic inhibition. *J Biol Chem* 288:25053–25065 Available at:
- 699 <http://www.ncbi.nlm.nih.gov/pubmed/23839941> [Accessed June 27, 2018].
- 700 Wyss C, Tse DHY, Komater M, Dammers J, Achermann R, Shah NJ, Kawohl W, Neuner I (2017) GABA
- 701 metabolism and its role in gamma-band oscillatory activity during auditory processing: An MRS
- 702 and EEG study. *Hum Brain Mapp* 38:3975–3987 Available at:

703 <http://www.ncbi.nlm.nih.gov/pubmed/28480987> [Accessed February 26, 2019].

704

705



706 **Figure Legends**

707 *Figure 1. The neuronal model.*

708 a. Intrinsic connectivities found in all nodes between layer 4 stellates (ss), inhibitory interneurons (ii),  
709 superficial pyramidal modules (sp) and deep pyramidal modules (dp).

710 b. All 6 nodes used are represented as a network on the left, showing the extrinsic connectivities  
711 (solid line = forward; dotted line = backward; dashed line = lateral). A left hemisphere representation  
712 of these bilateral nodes in primary auditory cortex, superior temporal gyrus and inferior-frontal  
713 gyrus (light, medium and dark grey, respectively).

714 c. A detailed view of the extrinsic population connections for forward (solid lines) and backward  
715 (dotted lines) connections.

716 d. Matrices of the extrinsic and intrinsic connectivity weights, all of which had a permitted variance  
717 of 1/16.

718 e. A process flow describing the steps taken in the meta-analysis phase.

719

720 *Figure 2. Event Related Fields (ERFs).*

721 a. Mean ERFs across all subjects for all six nodes for the standard and deviant trials from 0-380ms.  
722 The difference wave (MMN) is also shown. ERFs from the placebo condition are shown in blue and  
723 from the tiagabine condition in red. Significant ( $p < 0.05$ ) changes with time across the drug condition  
724 are shown as a thick black line within each axis. Shaded areas represent the standard error (SEM).

725 b. Significant differences for induced spectra power were found in the alpha ( $\alpha$ ), beta ( $\beta$ ) and lower  
726 and higher gamma bands ( $\gamma_1$  and  $\gamma_2$ ). Here they are shown as flat scalp maps (lower plots) with  
727 rostro-caudal activity versus time (upper plots). The time axis runs from 0–380 ms post-stimulus.

728 c. Source-reconstructed T-contrasts created for those frequency bands showing significant spatial  
729 changes across the drug condition in the 135 – 235 ms time window.

730

731 *Figure 3. Comparison between model and data.*

732 a. Predicted ERFs are shown for the standard and deviant conditions, along with the difference wave  
733 (Std–Dev). The placebo and tiagabine conditions are depicted in blue and red respectively with  
734 significant differences ( $p < 0.05$ ) shown as a thick black line within each axis.

735 b. Correlation coefficient between prediction and data for each node and each condition. Boxplots  
736 represent the distribution over subjects with small dots representing outliers and larger black circles  
737 representing the mean response of all subjects.

738

739 *Figure 4. Prediction of hidden states.*

740 a. Significant differences in the modulation of GABA-A synaptic scaling for each of the three  
741 symmetric nodes. Green/red show significantly greater/lesser GABA-A synaptic scaling for tiagabine  
742 than the placebo.

743 b. Tonic GABA-A scaling on deep interneurons in IFG, STG and Aud, for each individual, plotted for  
744 the placebo and tiagabine conditions. The standard and deviant conditions are plotted separately in  
745 the left and right columns respectively.

746 c. Linear fit with 95% confidence bounds for tonic GABA-A scaling on deep inhibitory neurons vs  
747 phasic GABA-A scaling from deep inhibitory neurons to thalamic projecting pyramidal cells ( $p = 1.7 \times 10^{-4}$ ,  
748 significant to  $p < 0.01$ , Bonferroni corrected).

749

750

751 *Table 1. Model parameters.*

752 Parameter values used by the neuronal model are shown with their permitted variances.

753

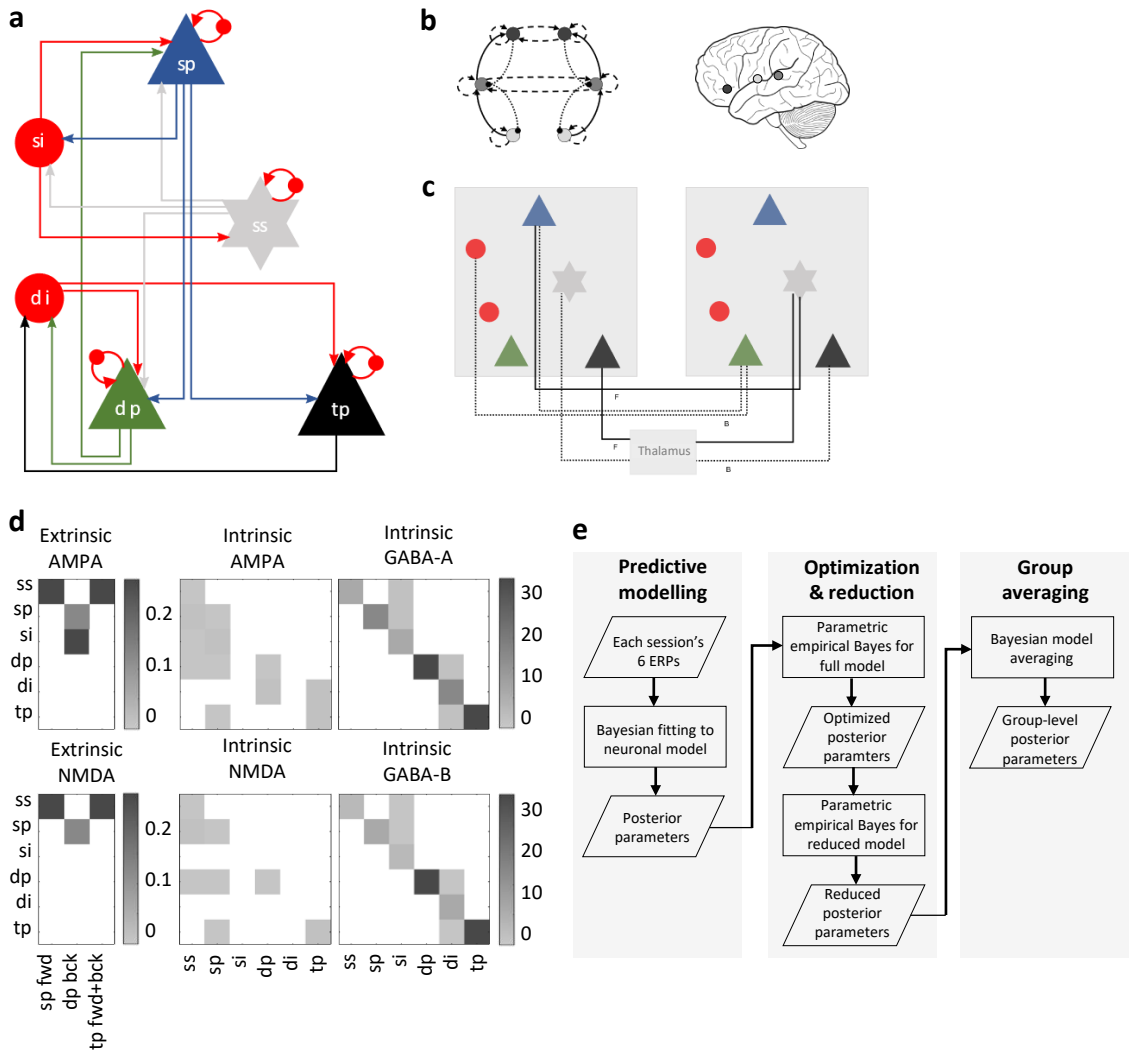

Figure 1

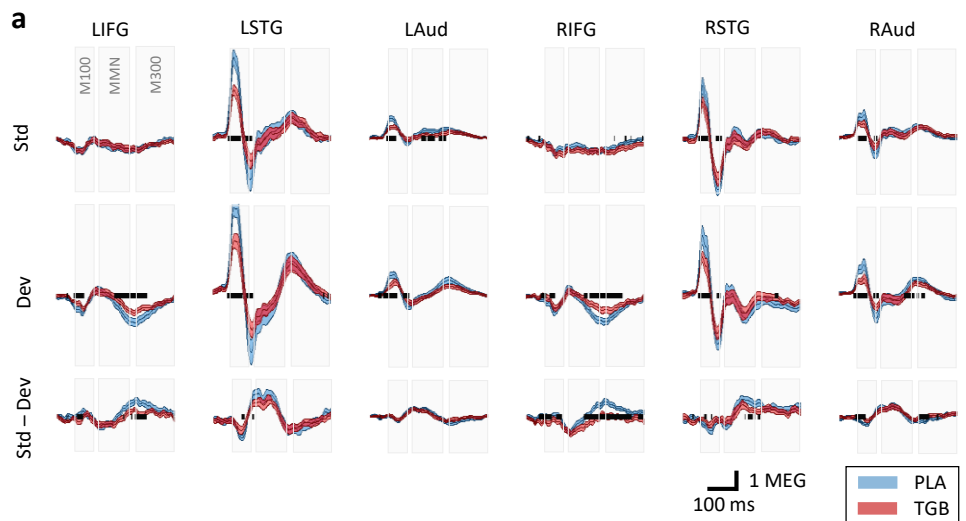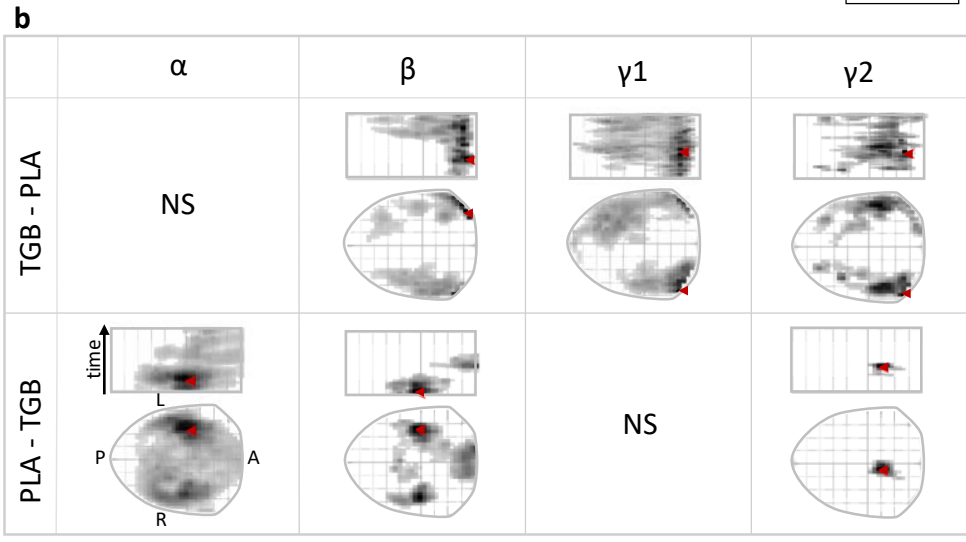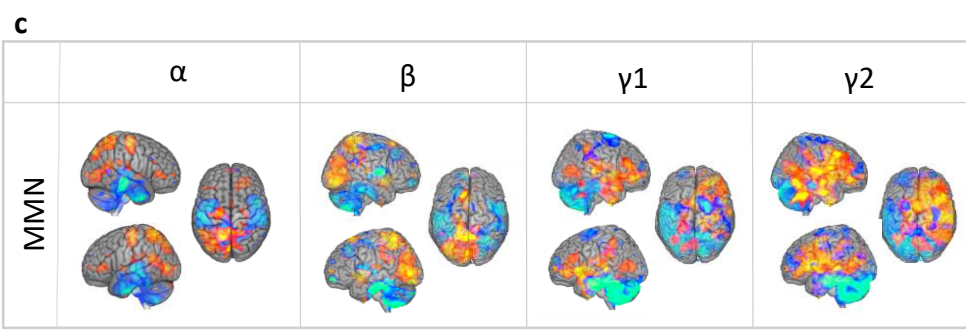

Tiagabine > Placebo (i.e. the top row in 'b')  
 Tiagabine < Placebo (i.e. the bottom row in 'b')  
 8      15

Figure 2

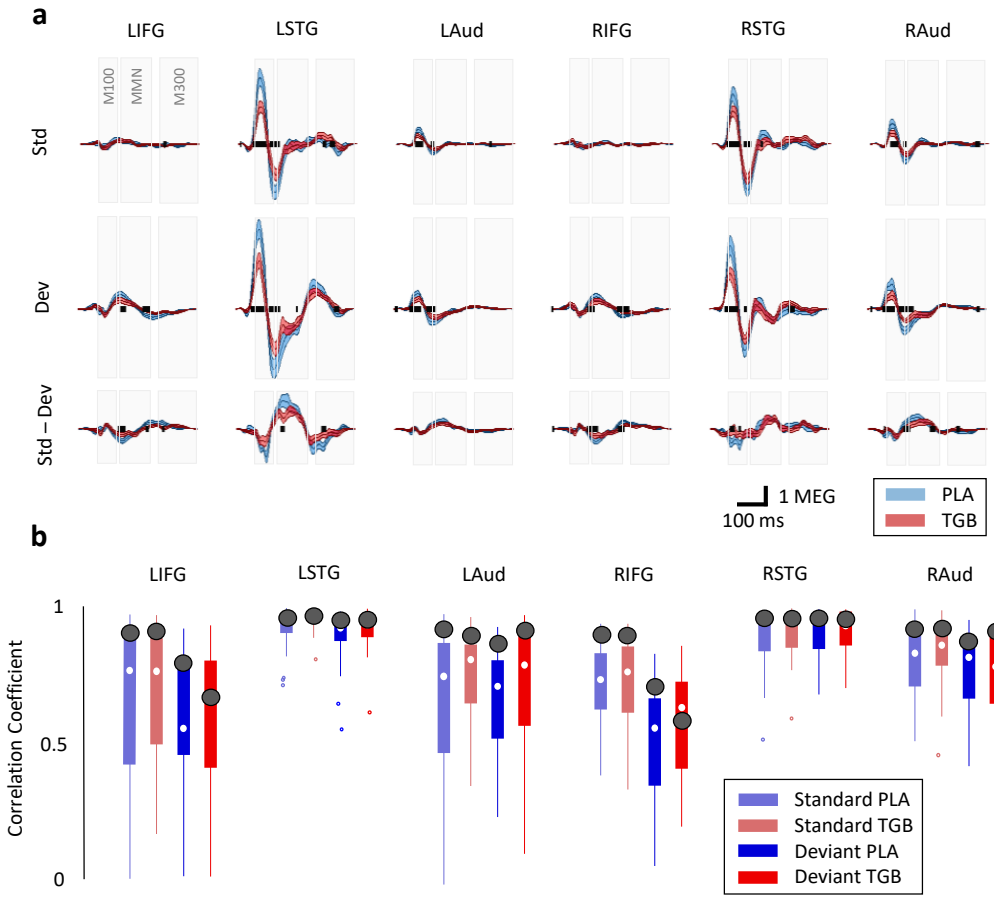

Figure 3

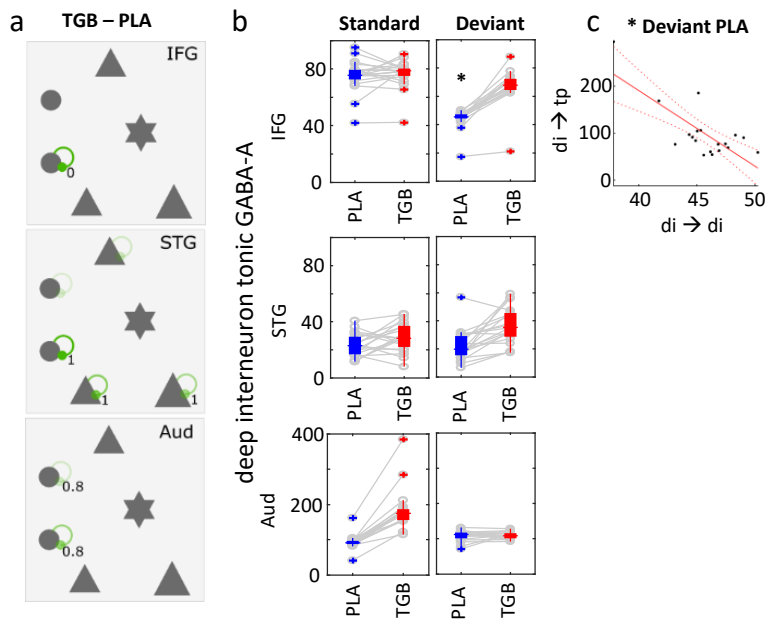

Figure 4

| Parameter grouping              | Parameter                      | Initial value | Permitted variance |
|---------------------------------|--------------------------------|---------------|--------------------|
| Decay<br>Constants, $\tau$ (ms) | AMPA $\tau$                    | 4             | 1/16               |
|                                 | NMDA $\tau$                    | 100           | 1/16               |
|                                 | GABAA $\tau$                   | 16            | 1/8                |
|                                 | GABAB $\tau$                   | 200           | 1/8                |
|                                 | $I_M \tau$                     | 160           | 0                  |
|                                 | $I_H \tau$                     | 100           | 0                  |
| Misc. strengths                 | K <sup>+</sup> leak G          | 1             | 0                  |
|                                 | Background V                   | 2.17          | 1/32               |
| Reversal potentials (mV)        | Na <sup>2+</sup> reversal      | 60            | 0                  |
|                                 | Ca <sup>2+</sup> reversal      | 10            | 0                  |
|                                 | Cl <sup>-</sup> reversal       | -90           | 0                  |
|                                 | K <sup>+</sup> reversal        | -70           | 0                  |
|                                 | $I_H$ reversal                 | -100          | 0                  |
| Firing threshold (mV)           | $V_T$ (all pops)               | -40           | 0                  |
| Firing precision                | $V_X$ (all pops)               | 1             | 1/32               |
| $I_H$ I-V slope                 | $V_{HX}$                       | 300           | 0                  |
| Cell<br>Capacitances (pF)       | $ss_C$                         | 200           | 1/32               |
|                                 | $sp_C$                         | 150           | 1/32               |
|                                 | $si_C$                         | 50            | 1/32               |
|                                 | $dp_C$                         | 400           | 1/32               |
|                                 | $di_C$                         | 50            | 1/32               |
|                                 | $tp_C$                         | 200           | 1/32               |
| Delays (ms)                     | intrinsic                      | 2             | 1/32               |
|                                 | extrinsic<br>cortico-cortical  | 16            | 1/32               |
|                                 | extrinsic thalamo-<br>cortical | 80            | 1/32               |

Table 1
